# Supplementary figures and images for: Improving peptide-MHC class I binding prediction for unbalanced datasets
Source: Springer Nature journal article supplement (doi:10.1186/1471-2105-9-385), 2008-09-19

**A0203**

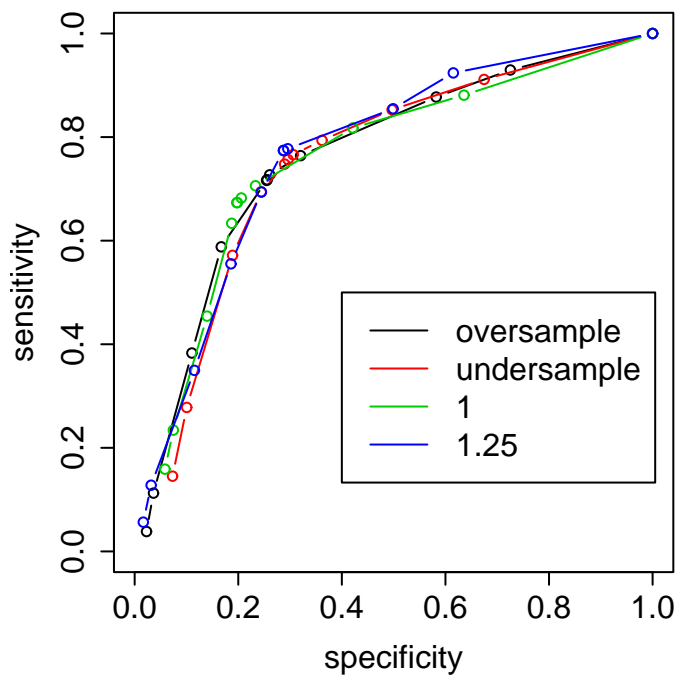

**A3101**

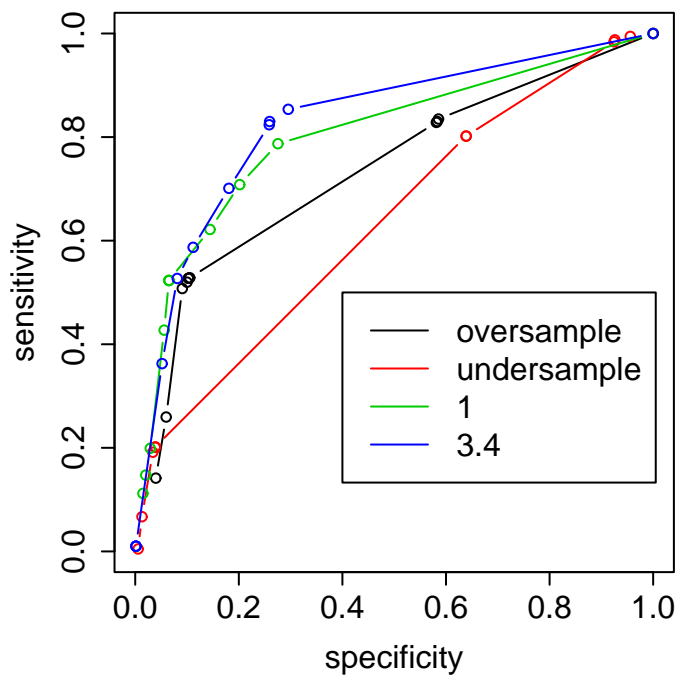

**B1501**

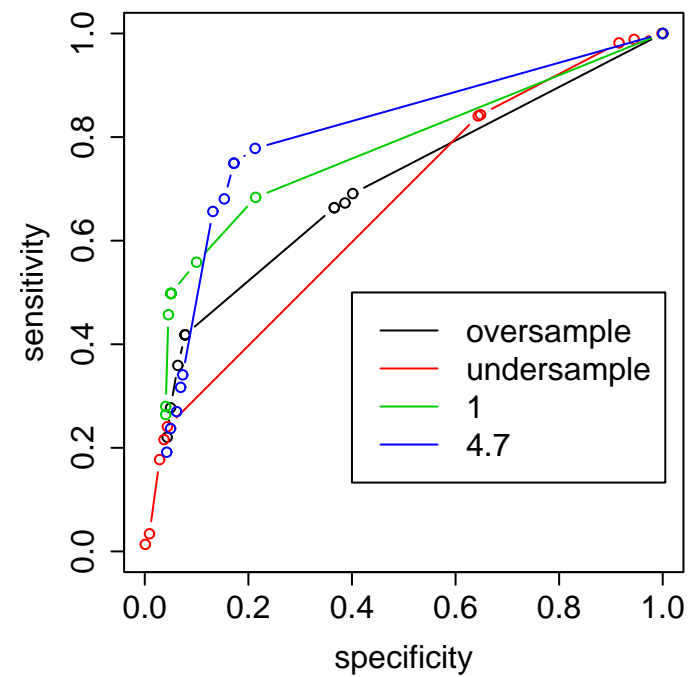

Supplement: Additional file 2 [file 1471-2105-9-385-s2.pdf]
